# Supplementary material
Source: Springer Nature journal article supplement (https://www.springermedizin.de/resource/supplementary/12943_2010_826_MOESM4_ESM.pdf/9554924)
Supplement: MOESM4 [file 9554924]

# Rab

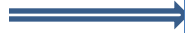

- Rab1 → Rab1a (pre-Golgi),1b (Endoplasmic reticulum; (Tisdale et al., 1992; Allan et al., 2000) Sannerud et al., 2006)
- Rab2 → Rab2a,2b (Endoplasmic reticulum; Tisdale et al., 1992)
- Rab3 → Rab3a,3b,3c,3d(Synaptic and secretory vesicles; Rupnik et al., 2007; Schlüter et al., 2002;Tsuboi and Fukuda, 2006)
- Rab 4 → Rab4a,4b,4c (Early and recycling endosomes; van der Sluijs et al., 1992; Mruk et al., 2007; Bottger et al., 1996)
- Rab5 → Rab5a,5b,5c ( clathrin coated vesicles, caveosomes, and early endosomes.; Pelkmans et al., 2004; Barbieri et al., 2000; Arnett et al., 2004; Bucci et al., 1995)
- Rab6 → Rab6a,6a',6b,6c((a,a',b) Golgi, (b) ERGIC-53-positive vesicles and neuronal cell specific; Jiang and Storrie, 2005; Martinez et al.,1994; Del Nery et al., 2006; Opdam et al.,2000;Shan et al., 2000)
- Rab7 → Rab7,7b(Late endosomes, lysosomes; Feng et al., 2001; Wang et al., 2007; Progida et al , 2010)
- Rab8 → Rab8a,8b(Golgi region, endosomes, dendrites, basolateral plasma membraneNachury et al., 2007; Peränen et al., 1996; Chen et al., 2001; Chen and Wandinger-Ness, 2001; Hattula et al., 2006; Linder et al., 2007)
- Rab9 → Rab9a,9b,9c (Late endosomes; Ganley et al., 2004; Lombardi et al., 1993; Narita et al., 2005)
- Rab10(Golgi; Babbey et al., 2006; Chen et al., 1993; Schuck et al., 2007)
- Rab11 → Rab11a,11b((a) Golgi and recycling endosomes;(b) neuronal specific; Ullrich et al., 1996; Wilcke et al., 2000; Khvotchev et al., 2003)
- Rab12(Centrosomes; Iida et al., 2005)
- Rab13(Tight junctions and endosomes; Marzesco et al., 2002)
- Rab14(Rough ER; Golgi/trans-Golgi and early endosomes; Junutula et al., 2004; Kyei et al., 2006;Proikas-Cezanne et al., 2006)
- Rab15(Early/sorting and recycling; Elferink and Strick, 2005; Zuk and Elferink, 2000 )
- Rab17 (Epithelial specific; apical recycling Endosome; Zacchi et al., 1998)
- Rab18(Dense apical tubules (kidney) and basolateral membrane (intestine); ER/lipid droplets; neuroendocrine secretory granules Lütcke et al., 1994; Ozeki et al., 2005; Vazquez-Martinez et al., 2007)
- Rab20(Epithelial specific: kidney dense apical tubules; Curtis and Gluck, 2005 )
- Rab21(Early endosomes; Pellinen et al., 2006)
- Rab22 → Rab22a,22b,22c(Early endosomes and trans-Golgi; Kauppi et al., 2002; Mesa et al., 2001; Roberts et al., 2006; Rodriguez-Gabin et al., 2001)
- Rab23(Plasma membrane and endosomes ; Evans et al., 2003)
- Rab24(Autophagosomes, nuclear inclusions; Munafó and Colombo, 2002; Overmeyer and Maltese, 2005)
- Rab25(Epithelial specific; apical recycling endosome; Casanova et al., 1999; Wang et al., 2000)
- Rab26(Secretory granules; Yoshie et al., 2000)
- Rab27 → Rab27a,27b(Epithelial specific; melanosomes; Barral et al., 2002; Futter, 2006; Tolmachova et al., 2007; Tsuboi and Fukuda, 2006)
- Rab32(Perinuclear vesicles; mitochondria; Alto et al., 2002; Wasmeier et al., 2006)
- Rab33 → Rab33a,33b(Medial Golgi; Valsdottir et al., 2001)
- Rab34(Cell surface membrane ruffles, lysosomes; Colucci et al., 2005; Sun and Endo, 2005;Sun et al., 2003; Wu et al., 2005)
- Rab35(Plasma membrane, endosomes, intercellular bridge; Kouranti et al., 2006)
- Rab37(Secretory granules (insulin and mast cell granules); Masuda et al., 2000; Brunner et al., 2007)
- Rab38 (Tyrosinase-positive vesicles; Wasmeier et al., 2006)
